# Supplementary material for: Evolutionary loss of foot muscle during development with characteristics of atrophy and no evidence of cell death
Source: PubMed Central journal article supplement (PMC6855805; doi:10.7554/elife.50645), 2019-10-15
Supplement: elife-50645-fig5-data1.pdf [file elife-50645-fig5-data1.pdf]

| Key                                         | Jerboa foot muscles |            |           |           |           |
|---------------------------------------------|---------------------|------------|-----------|-----------|-----------|
|                                             |                     | P0         | P2        | P4        |           |
| D = Good Desmin<br>d = Bad Desmin           | Group 1             | <b>DRM</b> | 63% ± 26% | 23% ± 26% | 17% ± 1%  |
| R = Good Tropomyosin<br>r = Bad Tropomyosin |                     | <b>dRM</b> | 10% ± 2%  | 5% ± 6%   | 31% ± 6%  |
|                                             |                     | <b>Drm</b> | 0         | 2% ± 3%   | 0         |
| M = Good Myosin<br>m = Bad Myosin           | Group 2a            | <b>rmT</b> | 8% ± 7%   | 7% ± 7%   | 23% ± 9%  |
|                                             |                     | <b>RmT</b> | 1% ± 3%   | 0         | 0         |
| T = Good Titin<br>t = Bad Titin             | Group 2b            | <b>RmT</b> | 4% ± 2%   | 1% ± 3%   | 17%16%    |
|                                             |                     | <b>rMT</b> | 15% ± 18% | 26% ± 11% | 12% ± 15% |
| A = Good α-actinin<br>a = Bad α-actinin     | Group 3             | <b>mtA</b> | 0         | 25% ± 21% | 25% ± 18% |
|                                             |                     | <b>MTa</b> | 0         | 0         | 0         |
| Y = Good Myomesin<br>y = Bad Myomesin       | Group 4             | <b>mtY</b> | 5% ± 4%   | 36% ± 18% | 27% ± 16% |
|                                             |                     | <b>MTy</b> | 0         | 0         | 0         |
