# Supplementary material for: Evolutionary loss of foot muscle during development with characteristics of atrophy and no evidence of cell death
Source: PubMed Central journal article supplement (PMC6855805; doi:10.7554/elife.50645), 2019-10-15
Supplement: elife-50645-fig5-data2.pdf [file elife-50645-fig5-data2.pdf]

| <b>Key</b>                                                                                                            |            | <b>Stain: Desmin, Tropomyosin, Myosin</b> |           |           |                     |           |           |
|-----------------------------------------------------------------------------------------------------------------------|------------|-------------------------------------------|-----------|-----------|---------------------|-----------|-----------|
| D = Good Desmin<br>d = Bad Desmin<br>R = Good Tropomyosin<br>r = Bad Tropomyosin<br>M = Good Myosin<br>m = Bad Myosin |            | <b>Hand muscles</b>                       |           |           | <b>Foot muscles</b> |           |           |
|                                                                                                                       |            | <b>P0</b>                                 | <b>P2</b> | <b>P4</b> | <b>P0</b>           | <b>P2</b> | <b>P4</b> |
|                                                                                                                       | <b>DRM</b> | 94% ± 1%                                  | 87% ± 2%  | 96% ± 1%  | 63% ± 26%           | 23% ± 26% | 17% ± 1%  |
|                                                                                                                       | <b>drm</b> | 4% ± 2%                                   | 5% ± 7%   | 0         | 16% ± 14%           | 48% ± 15% | 36% ± 4%  |
|                                                                                                                       | <b>dRM</b> | 0                                         | 4% ± 5%   | 4% ± 1%   | 10% ± 2%            | 5% ± 6%   | 31% ± 6%  |
|                                                                                                                       | <b>drM</b> | 2% ± 3%                                   | 0         | 0         | 9% ± 13%            | 7% ± 10%  | 7% ± 9%   |
|                                                                                                                       | <b>dRm</b> | 0                                         | 4% ± 5%   | 0         | 2% ± 0%             | 6% ± 9%   | 9% ± 13%  |
|                                                                                                                       | <b>Drm</b> | 0                                         | 0         | 0         | 0                   | 2% ± 3%   | 0         |
|                                                                                                                       | <b>DrM</b> | 0                                         | 0         | 0         | 1% ± 0%             | 5% ± 6%   | 0         |
| <b>DRm</b>                                                                                                            | 0          | 0                                         | 0         | 0         | 5% ± 7%             | 0         |           |
| <b>Key</b>                                                                                                            |            | <b>Stain: Desmin, Myosin, Titin</b>       |           |           |                     |           |           |
| D = Good Desmin<br>d = Bad Desmin<br>M = Good Myosin<br>m = Bad Myosin<br>T = Good Titin<br>t = Bad Titin             |            | <b>Hand muscles</b>                       |           |           | <b>Foot muscles</b> |           |           |
|                                                                                                                       |            | <b>P0</b>                                 | <b>P2</b> | <b>P4</b> | <b>P0</b>           | <b>P2</b> | <b>P4</b> |
|                                                                                                                       | <b>DMT</b> | 90% ± 14%                                 | 82% ± 13% | 95% ± 4%  | 32% ± 9%            | 11% ± 15% | 7% ± 5%   |
|                                                                                                                       | <b>dmt</b> | 0                                         | 7% ± 6%   | 2% ± 3%   | 26% ± 13%           | 47% ± 10% | 21% ± 23% |
|                                                                                                                       | <b>dMT</b> | 2% ± 2%                                   | 7% ± 4%   | 3% ± 1%   | 33% ± 7%            | 33% ± 23% | 33% ± 18% |
|                                                                                                                       | <b>dmT</b> | 8% ± 11%                                  | 0         | 0         | 10% ± 3%            | 2% ± 3%   | 38% ± 1%  |
|                                                                                                                       | <b>dMt</b> | 0                                         | 0         | 0         | 0                   | 6% ± 8%   | 0         |
|                                                                                                                       | <b>Dmt</b> | 0                                         | 0         | 0         | 0                   | 0         | 0         |
|                                                                                                                       | <b>DmT</b> | 0                                         | 1% ± 2%   | 0         | 0                   | 0         | 0         |
| <b>DMt</b>                                                                                                            | 0          | 3% ± 4%                                   | 0         | 0         | 1% ± 2%             | 0         |           |
