# Supplementary material for: Evolutionary loss of foot muscle during development with characteristics of atrophy and no evidence of cell death
Source: PubMed Central journal article supplement (PMC6855805; doi:10.7554/elife.50645), 2019-10-15
Supplement: elife-50645-fig5-data3.pdf [file elife-50645-fig5-data3.pdf]

| Key                  | Stain: Tropomyosin, Myosin, Titin |              |           |          |              |           |           |
|----------------------|-----------------------------------|--------------|-----------|----------|--------------|-----------|-----------|
|                      |                                   | Hand muscles |           |          | Foot muscles |           |           |
|                      |                                   | P0           | P2        | P4       | P0           | P2        | P4        |
| R = Good Tropomyosin | <b>RMT</b>                        | 66% ± 30%    | 72% ± 25% | 91% ± 7% | 45% ± 33%    | 15% ± 21% | 24% ± 17% |
| r = Bad Tropomyosin  | <b>rmt</b>                        | 6% ± 4%      | 5% ± 5%   | 2% ± 4%  | 18% ± 13%    | 48% ± 12% | 24% ± 5%  |
| M = Good Myosin      | <b>rMT</b>                        | 14% ± 25%    | 23% ± 27% | 3% ± 5%  | 20% ± 19%    | 24% ± 11% | 12% ± 15% |
| m = Bad Myosin       | <b>rmT</b>                        | 0            | 0         | 0        | 8% ± 7%      | 7% ± 7%   | 23% ± 9%  |
| T = Good Titin       | <b>rMt</b>                        | 4% ± 5%      | 0         | 0        | 1% ± 2%      | 5% ± 9%   | 0         |
| t = Bad Titin        | <b>Rmt</b>                        | 3% ± 2%      | 0         | 0        | 2% ± 4%      | 0         | 0         |
|                      | <b>RmT</b>                        | 5% ± 9%      | 0         | 4% ± 4%  | 3% ± 3%      | 2% ± 4%   | 17% ± 16% |
|                      | <b>RMt</b>                        | 2% ± 4%      | 0         | 0        | 1% ± 3%      | 0         | 0         |
