# Supplementary material for: Evolutionary loss of foot muscle during development with characteristics of atrophy and no evidence of cell death
Source: PubMed Central journal article supplement (PMC6855805; doi:10.7554/elife.50645), 2019-10-15
Supplement: elife-50645-fig5-data4.pdf [file elife-50645-fig5-data4.pdf]

| Key                        | Stain: Myosin, Titin, $\alpha$ -actinin |              |               |              |               |               |               |
|----------------------------|-----------------------------------------|--------------|---------------|--------------|---------------|---------------|---------------|
|                            |                                         | Hand muscles |               |              | Foot muscles  |               |               |
|                            |                                         | P0           | P2            | P4           | P0            | P2            | P4            |
| M = Good Myosin            | <b>MTA</b>                              | 76% $\pm$ 1% | 84% $\pm$ 17% | 93% $\pm$ 6% | 55% $\pm$ 23% | 27% $\pm$ 28% | 17% $\pm$ 3%  |
| m = Bad Myosin             | <b>mta</b>                              | 10% $\pm$ 5% | 9% $\pm$ 13%  | 2% $\pm$ 4%  | 17% $\pm$ 9%  | 38% $\pm$ 32% | 34% $\pm$ 12% |
| T = Good Titin             | <b>mTA</b>                              | 12% $\pm$ 6% | 3% $\pm$ 4%   | 3% $\pm$ 3%  | 12% $\pm$ 6%  | 6% $\pm$ 8%   | 23% $\pm$ 15% |
| t = Bad Titin              | <b>mtA</b>                              | 1% $\pm$ 1%  | 3% $\pm$ 3%   | 2% $\pm$ 3%  | 0             | 25% $\pm$ 21% | 25% $\pm$ 18% |
| A = Good $\alpha$ -actinin | <b>mTa</b>                              | 0            | 0             | 0            | 0             | 0             | 0             |
| a = Bad $\alpha$ -actinin  | <b>Mta</b>                              | 0            | 0             | 0            | 0             | 0             | 0             |
|                            | <b>MtA</b>                              | 1% $\pm$ 1%  | 1% $\pm$ 2%   | 0            | 16% $\pm$ 13% | 4% $\pm$ 3%   | 1% $\pm$ 2%   |
|                            | <b>MTa</b>                              | 0            | 0             | 0            | 0             | 0             | 0             |
