# Supplementary material for: Evolutionary loss of foot muscle during development with characteristics of atrophy and no evidence of cell death
Source: PubMed Central journal article supplement (PMC6855805; doi:10.7554/elife.50645), 2019-10-15
Supplement: elife-50645-fig5-data5.pdf [file elife-50645-fig5-data5.pdf]

| Key               | Stain: Myosin, Titin, Myomesin |              |           |          |              |           |           |
|-------------------|--------------------------------|--------------|-----------|----------|--------------|-----------|-----------|
|                   |                                | Hand muscles |           |          | Foot muscles |           |           |
|                   |                                | P0           | P2        | P4       | P0           | P2        | P4        |
| M = Good Myosin   | <b>MTY</b>                     | 100%         | 82% ± 9%  | 95% ± 9% | 83% ± 7%     | 29% ± 12% | 11% ± 10% |
| m = Bad Myosin    | <b>mtY</b>                     | 0            | 3% ± 1%   | 2% ± 4%  | 3% ± 5%      | 19% ± 10% | 22% ± 9%  |
| T = Good Titin    | <b>mTY</b>                     | 0            | 10% ± 12% | 2% ± 4%  | 9% ± 5%      | 13% ± 19% | 24% ± 27% |
| t = Bad Titin     | <b>mtY</b>                     | 0            | 3% ± 6%   | 1% ± 2%  | 5% ± 4%      | 36% ± 18% | 27% ± 16% |
| Y = Good Myomesin | <b>mTy</b>                     | 0            | 0         | 0        | 0            | 0         | 0         |
| y = Bad Myomesin  | <b>Mty</b>                     | 0            | 0         | 0        | 0            | 0         | 0         |
|                   | <b>MtY</b>                     | 0            | 1% ± 2%   | 0        | 0            | 4% ± 6%   | 16% ± 22% |
|                   | <b>MTy</b>                     | 0            | 0         | 0        | 0            | 0         | 0         |
